# Supplementary material for: Independent Evolutionary Lineages in a Globular Cactus Species Complex Reveals Hidden Diversity in a Central Chile Biodiversity Hotspot
Source: MDPI journal article supplement (doi:10.3390/genes13020240), 2022-01-27
Supplement: s1 [file s1]

**Table S1:** Primers for the multiplex of microsatellite analysis

| <b>Name</b> | <b>Motive</b> | <b>PRIMER LEFT SEQUENCE</b> | <b>PRIMER RIGHT SEQUENCE</b> | <b>Ta (°C)</b> |
|-------------|---------------|-----------------------------|------------------------------|----------------|
| PS5         | CG            | AACTAGGGAGTAGGAGTGTGTCAT    | TGGGCTGCTAAAGGAAGAGA         | 61             |
| PS9         | GT            | AAATCCCAAATCTGCGCAAC        | ACGCCTGCTAAATTCTAGGGT        | 58             |
| PC2         | AG            | TGTCGATTGGGCAAACATT         | GCACTATGATCAGGTAAGTACC       | 58             |
| PC11        | TG            | CAGCACAGTTAAGACTCAGGTCA     | TAGACGGTCAAAGTGCTGCT         | 61             |
| PM10        | TC            | GACTAGTTGGAGTCCGAAGCC       | CCAGAAGTAGAGGAACCTACCC       | 61             |
| PA12        | TGC           | GTGGGCCCTACAGGATGAT         | CGGTAAGTATTCGGAGCAA          | 58             |
| PM8         | GT            | CCTAATGCAATGTCGCTCCT        | CACATGTGGTCCCACACAAT         | 58             |
| PC10        | TC            | GTTGTTCTGGGTACGGTTGG        | TTTGTATGGCCGCTTGTTT          | 58             |
| PM6         | CT            | ATGTCATGCACAATGCAGGT        | AGTAATGGGCTGTCGATTGG         | 61             |
| PC7         | GA            | TCATTGTGGAACAATAGAGGGA      | CTTCTGCCAGACCCATTGAT         | 58             |
| PM7         | GA            | CAACCGTGAATAATGGAGAGA       | ATGAGCCCAGCCTACCCT           | 58             |
| PA6         | GA            | CATGCATAGTGCCATGAAGC        | TGCATTCAAGCACAACCTCC         | 58             |

Ta = annealing temperature
