# Supplementary figures and images for: Independent Evolutionary Lineages in a Globular Cactus Species Complex Reveals Hidden Diversity in a Central Chile Biodiversity Hotspot
Source: MDPI journal article supplement (doi:10.3390/genes13020240), 2022-01-27

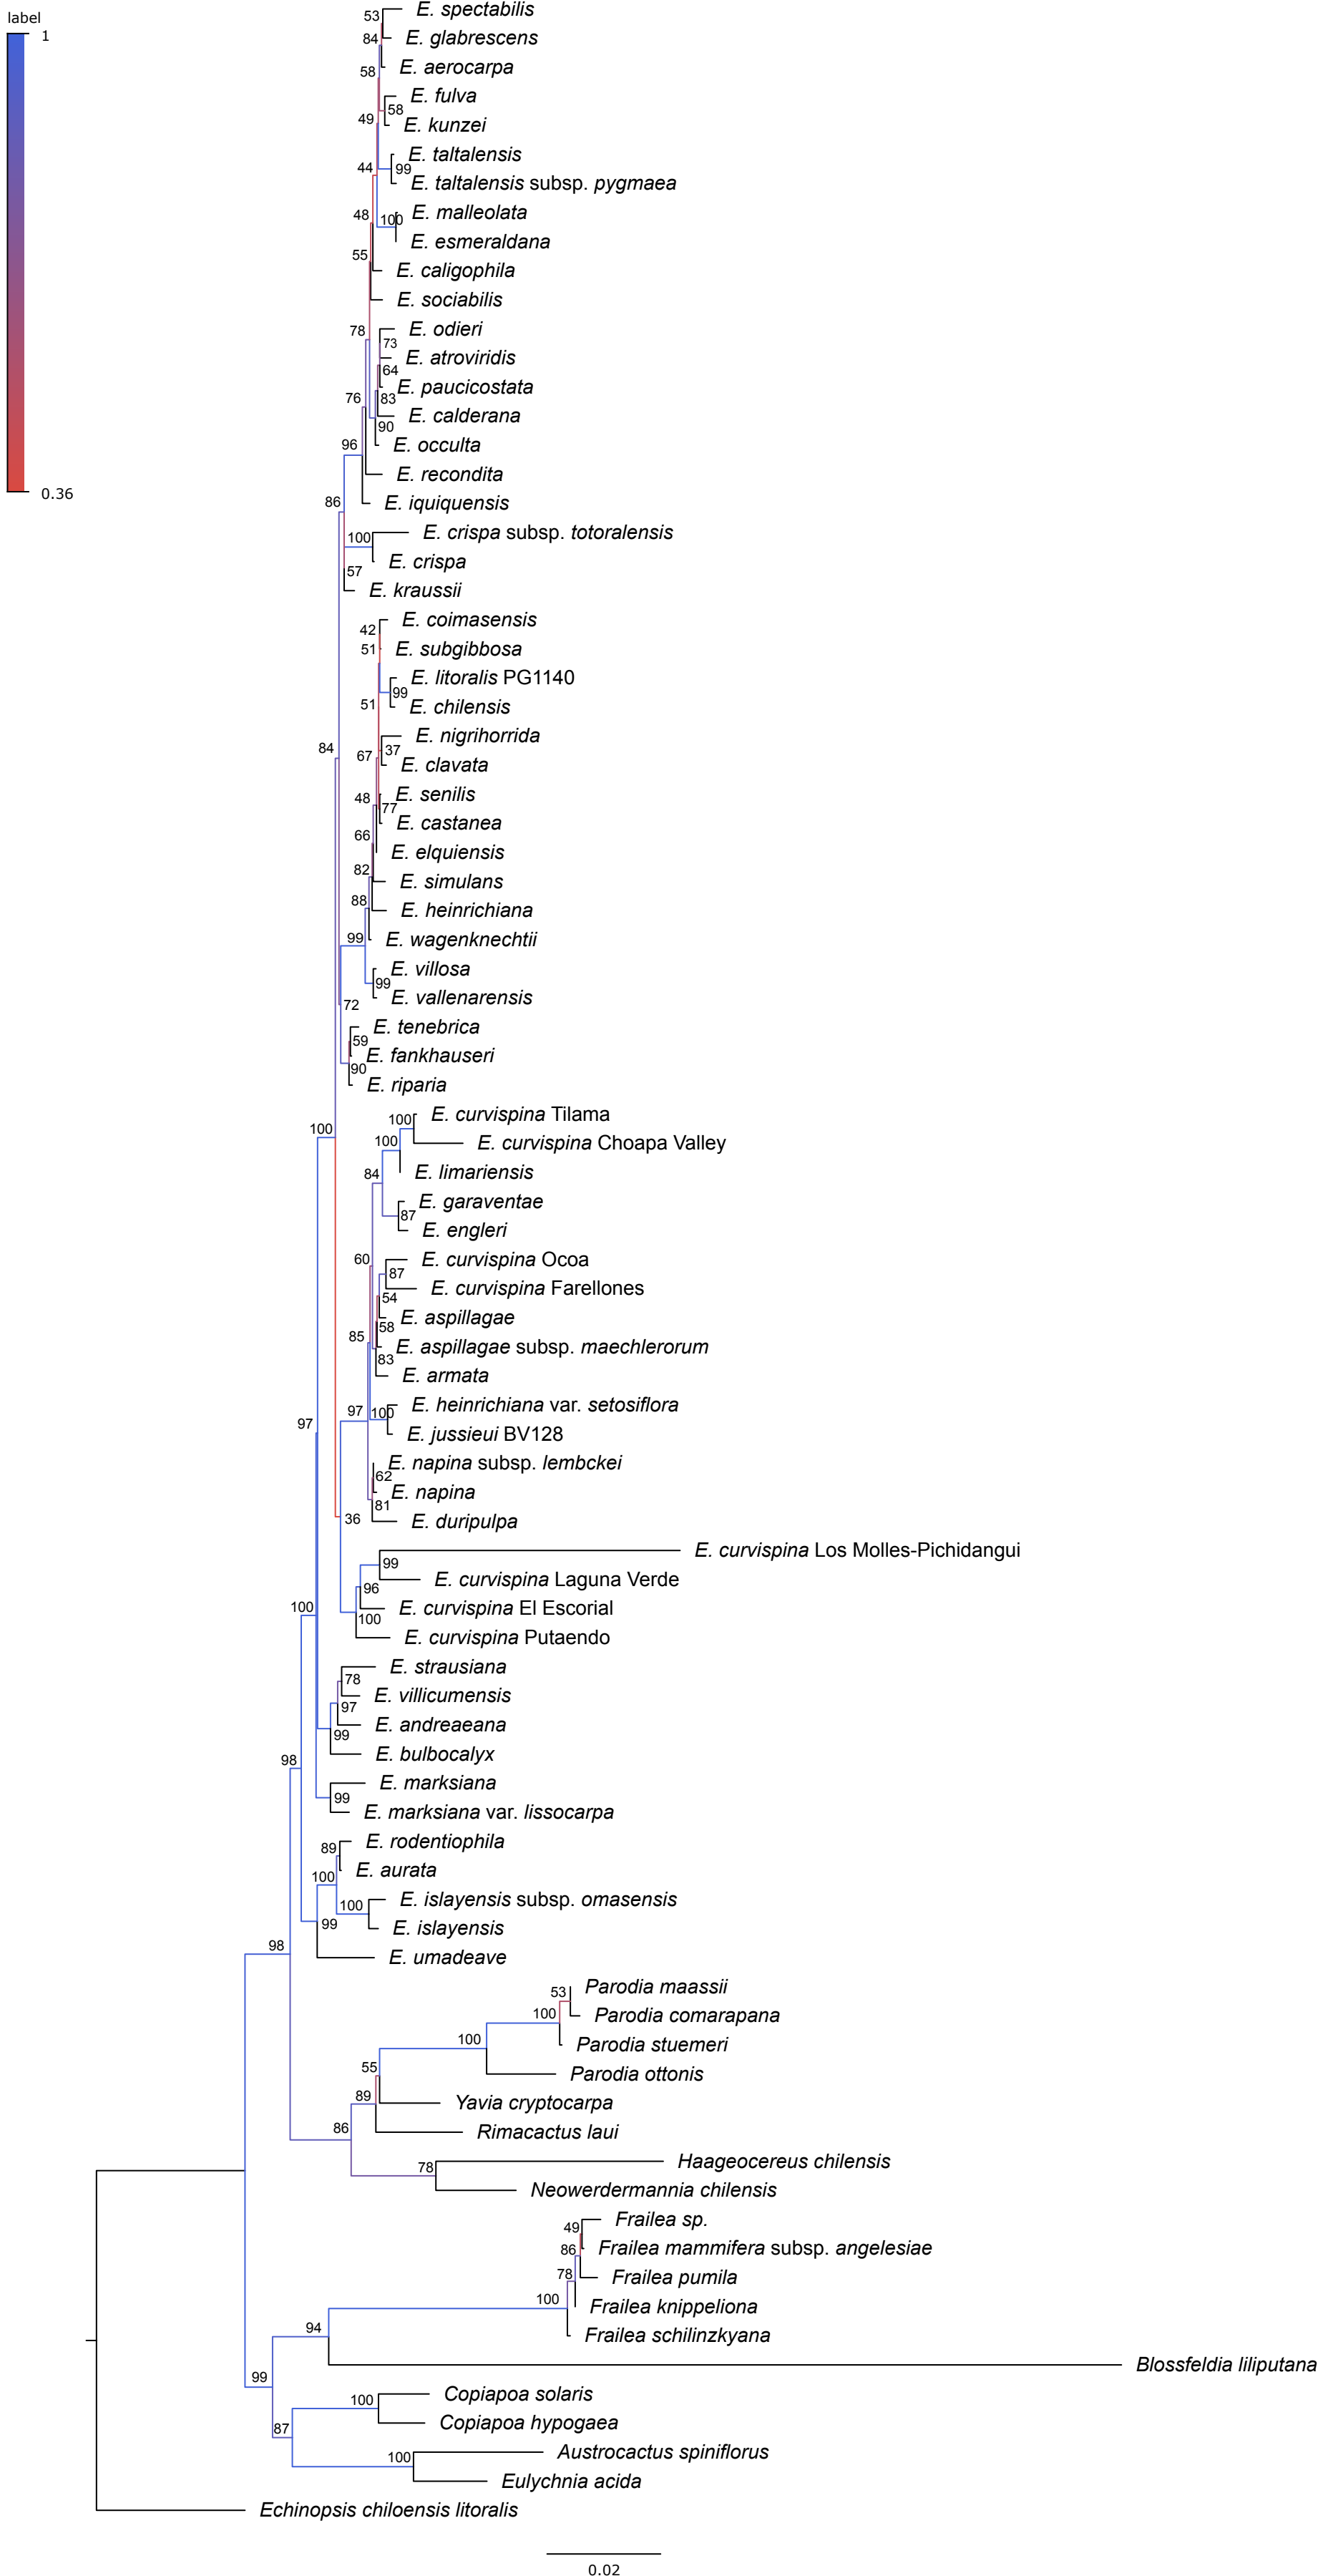

Supplement: s1 [file s1]

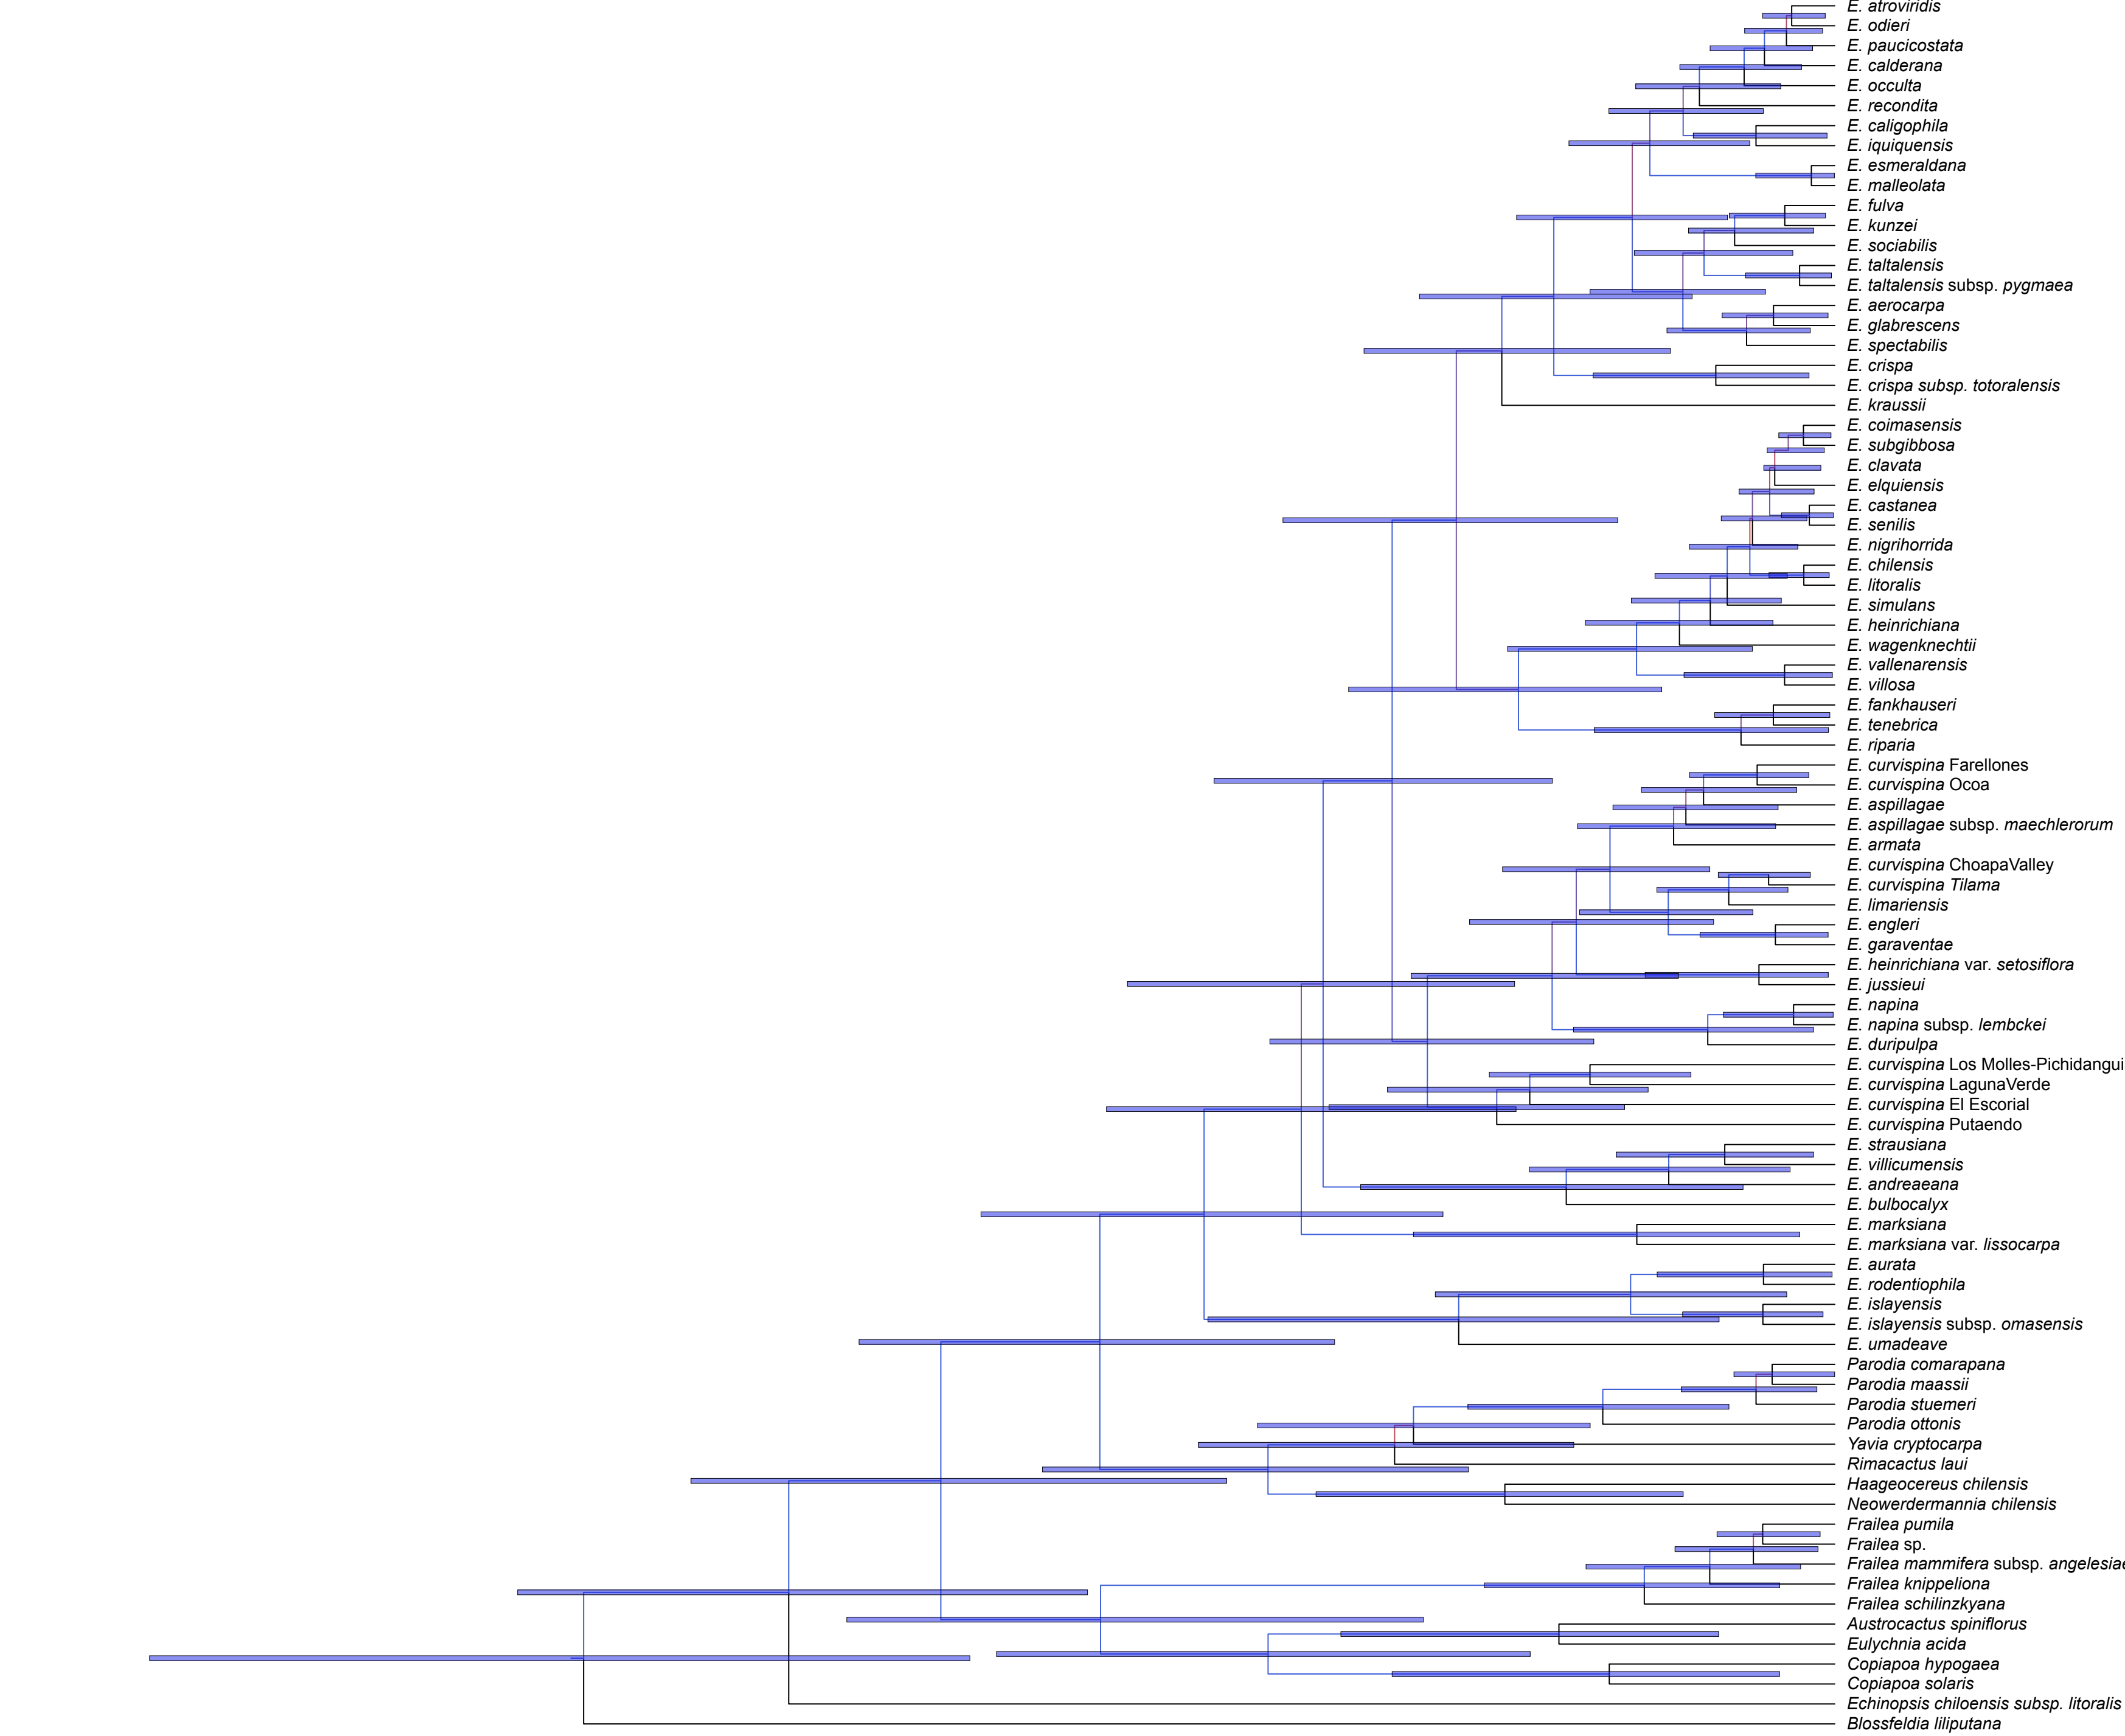

Supplement: s1 [file s1]

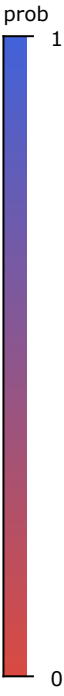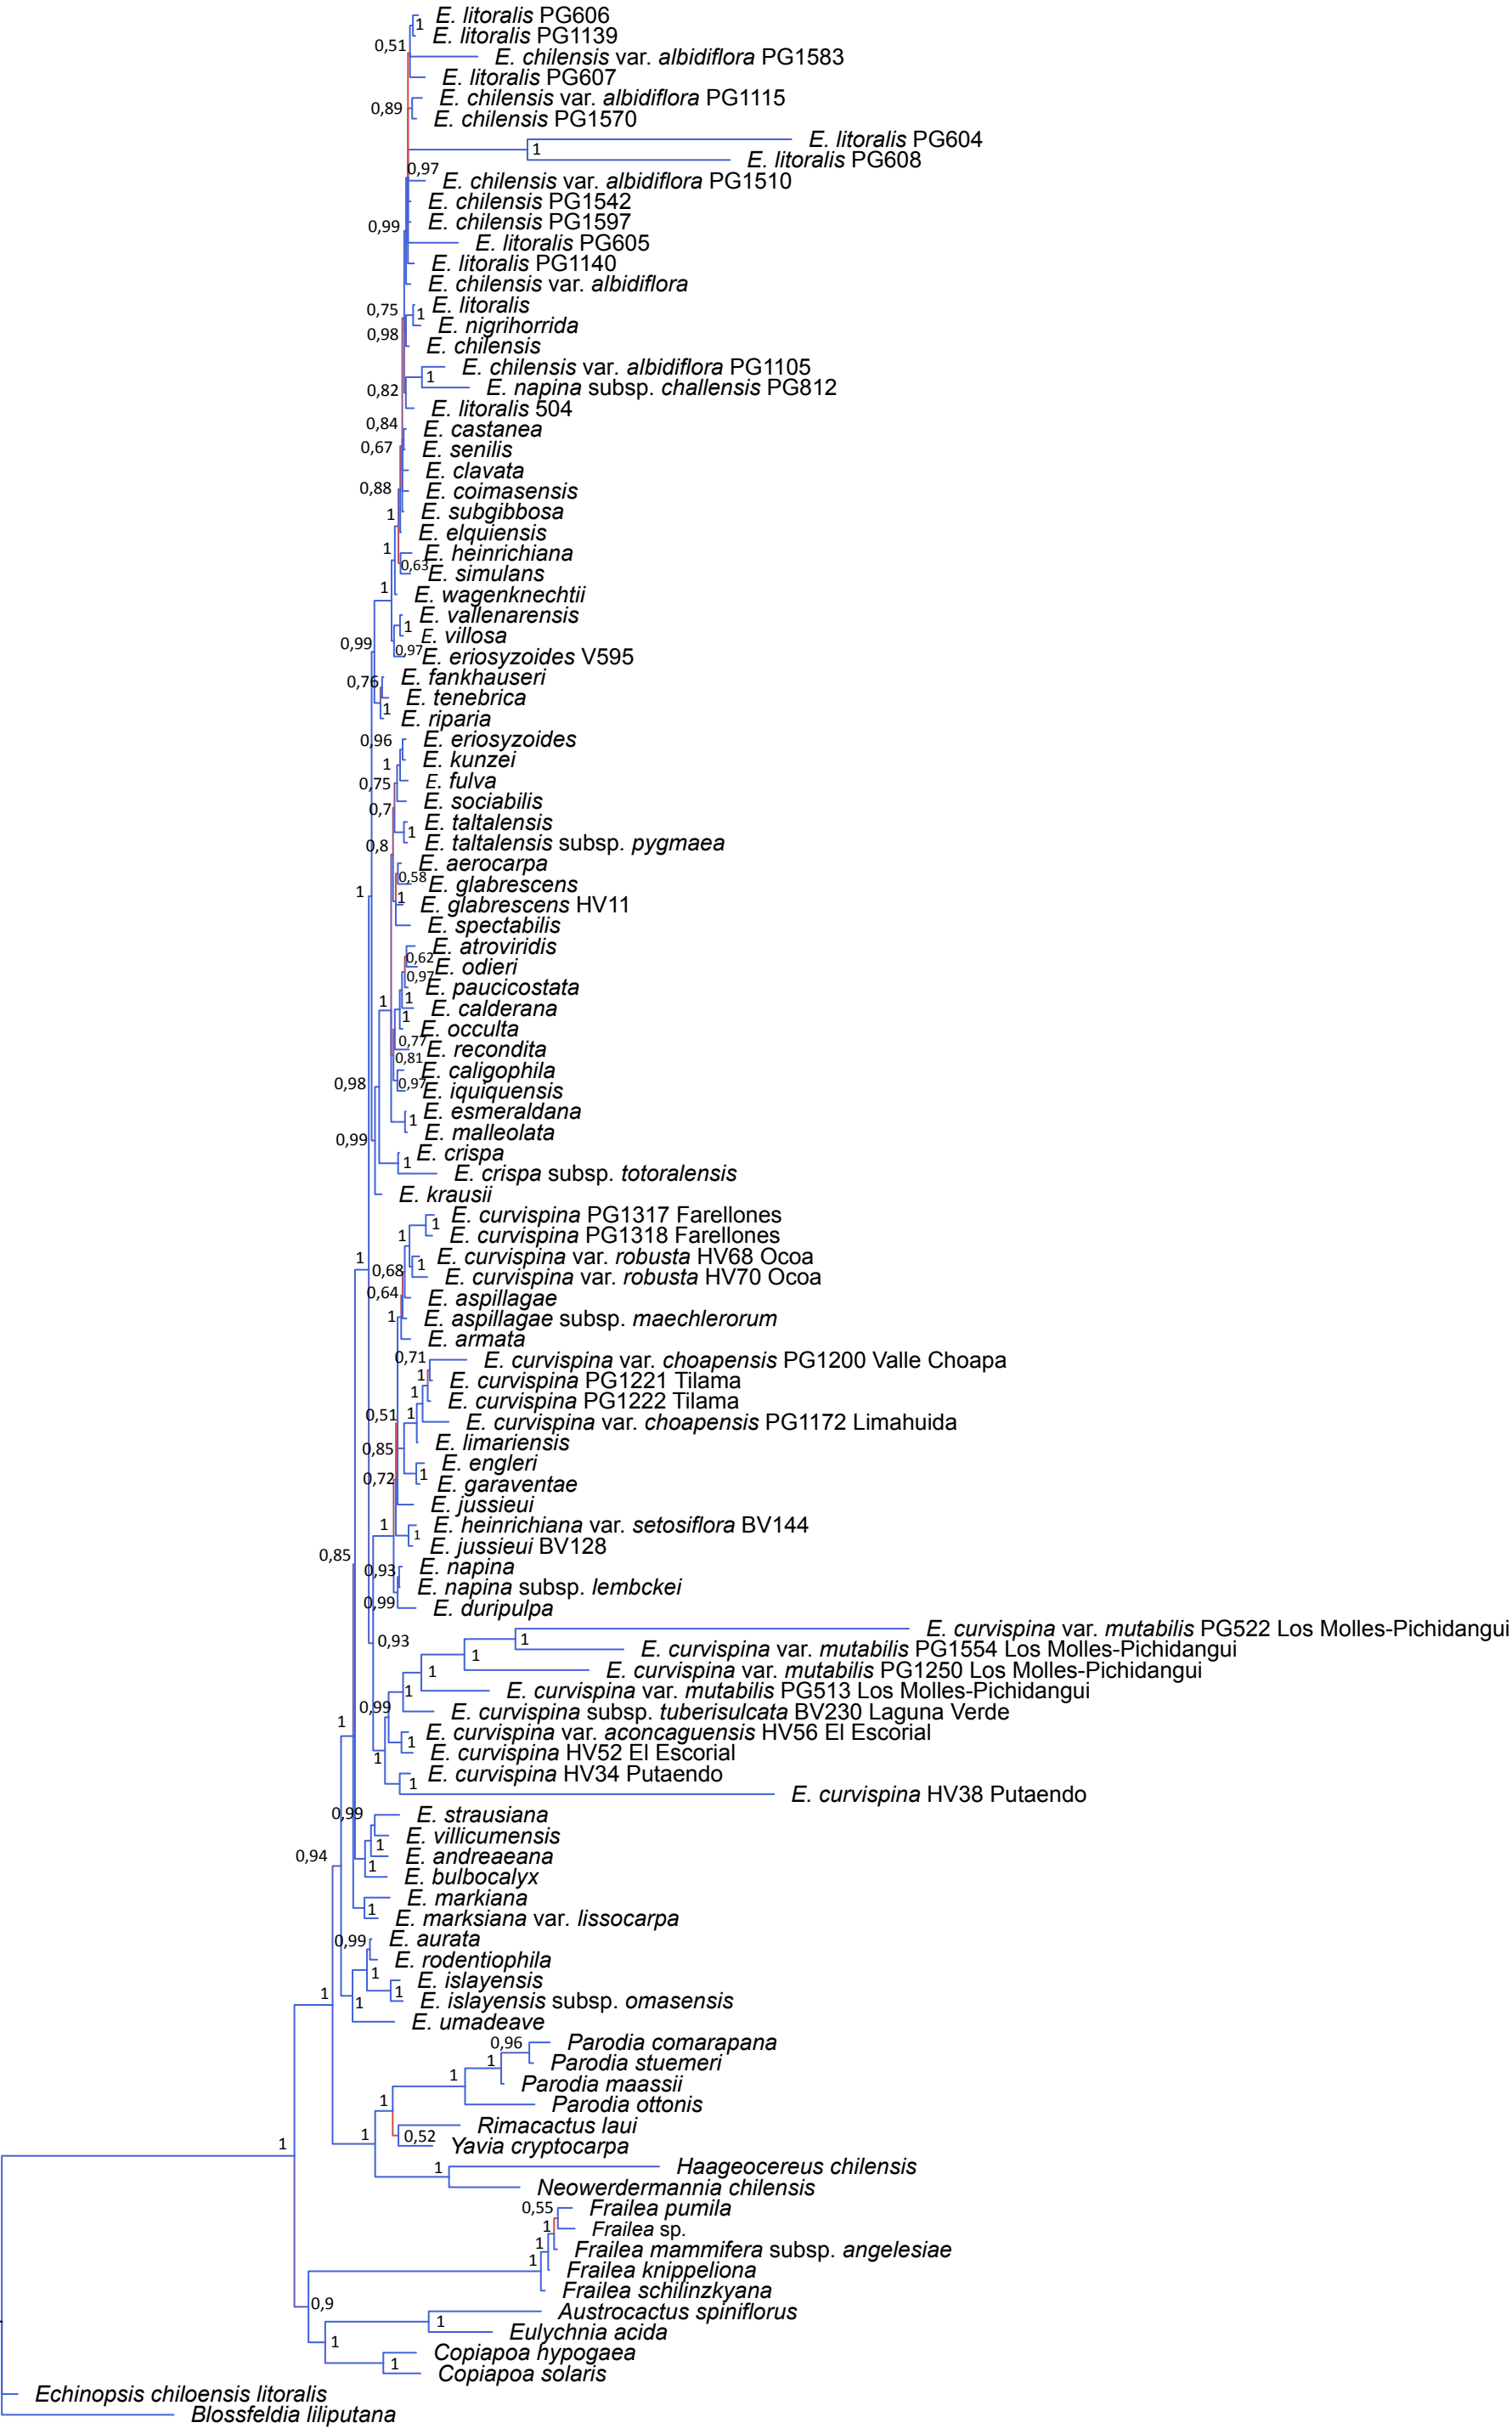

0.04

Supplement: s1 [file s1]
